# Supplementary material for: Synergistic effect of alkali metal doping and thiocyanate passivation in CsPbBr3 for HTM-free all-inorganic perovskite solar cells
Source: Royal Society of Chemistry journal article supplement (doi:10.1039/d3dt01618h), 2023-01-01
Supplement: d3dt01618h1.pdf [file d3dt01618h1.pdf]

## Supporting Information

### **Synergistic effect of alkali metal doping and thiocyanate passivation in CsPbBr<sub>3</sub> for HTM-free all-inorganic perovskite solar cells**

Shiqiang Jiang <sup>a,#</sup>, Haojie Sui <sup>a,#</sup>, Benlin He <sup>a,\*</sup>, Xinyi Zhang <sup>a</sup>, Zhihao Zong <sup>a</sup>, Haiyan  
Chen <sup>a,\*</sup>, Qunwei Tang <sup>b,\*</sup>

<sup>a</sup> School of Materials Science and Engineering, Ocean University of China, Qingdao  
266100, PR China. E-mail: blhe@ouc.edu.cn, chenhaiyan@ouc.edu.cn

<sup>b</sup> Institute of Carbon Neutrality, College of Chemical and Biological Engineering,  
Shandong University of Science and Technology, Qingdao 266590, PR China. E-  
mail: tangqunwei@jnu.edu.cn

# Shiqiang Jiang and Haojie Sui contributed equally to this work.

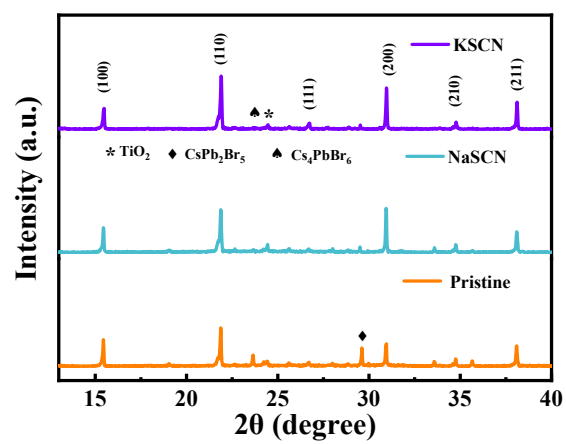

**Fig. S1** XRD patterns of various CsPbBr<sub>3</sub> films.

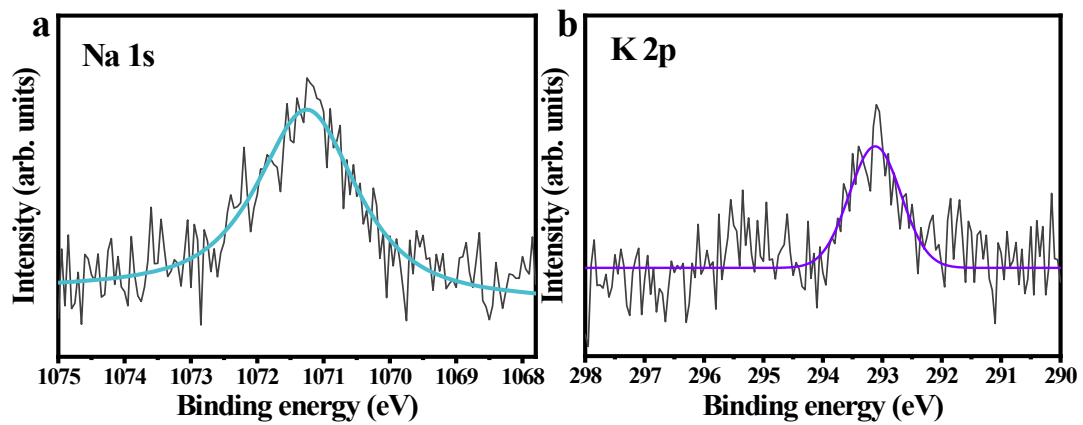

**Fig. S2** High-resolution XPS spectra of (a) Na 1s and (b) K 2p of the doped CsPbBr<sub>3</sub> films.

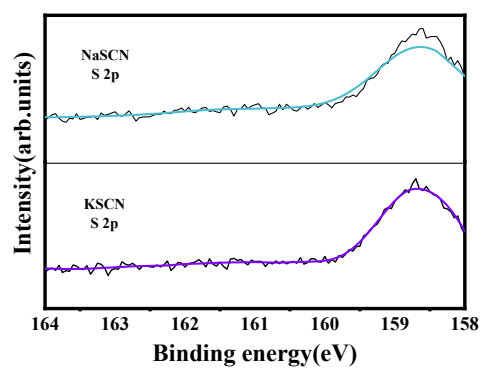

**Fig. S3** High-resolution XPS spectra of S 2p of NaSCN and KSCN doped CsPbBr<sub>3</sub> films.

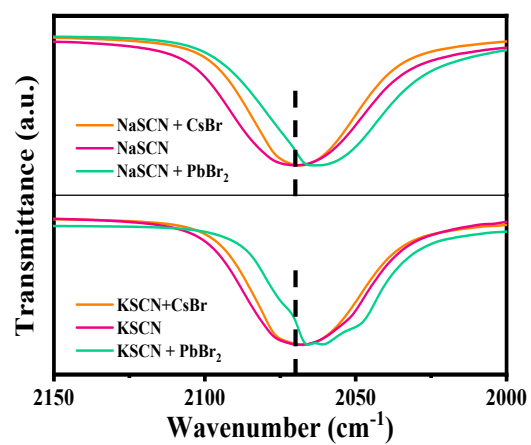

**Fig. S4** FTIR spectra of Na/KSCN, Na/KSCN + CsBr and Na/KSCN + PbBr<sub>2</sub>.

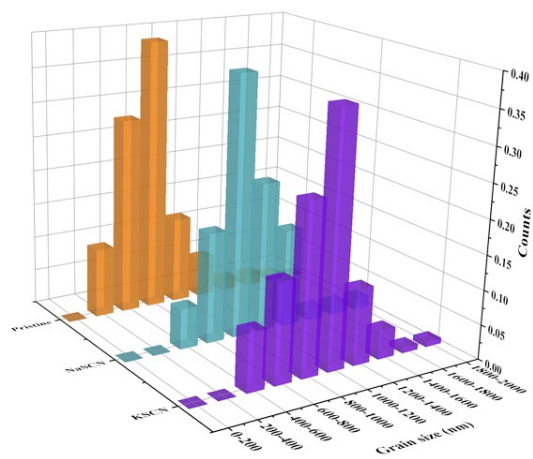

**Fig. S5** The grain size distribution of various CsPbBr<sub>3</sub> films.

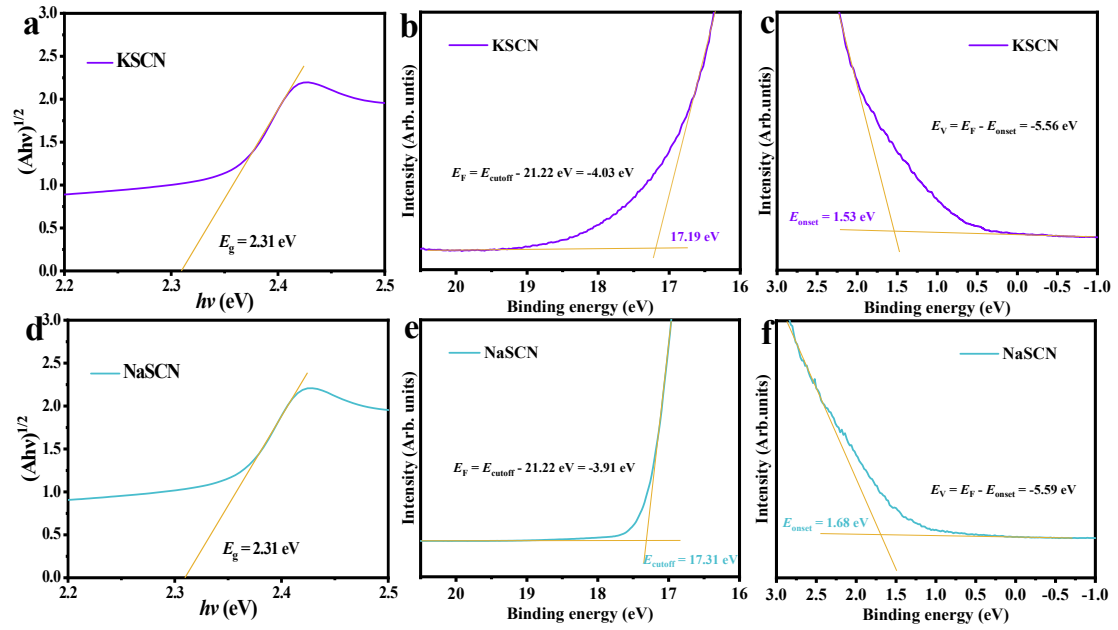

**Fig. S6** (a)&(d) Tauc plots, (b)&(e) the secondary electron cutoff and (c)&(f) onset binding energies of NaSCN and KSCN doped CsPbBr<sub>3</sub> films.

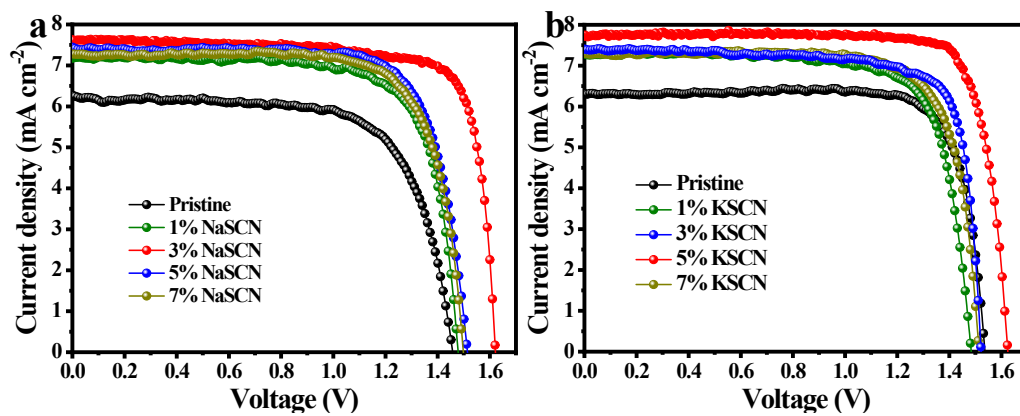

**Fig. S7** *J-V* curves of HTM-free CsPbBr<sub>3</sub> PSCs doped with (a) NaSCN and (b) KSCN at different molar ratio.



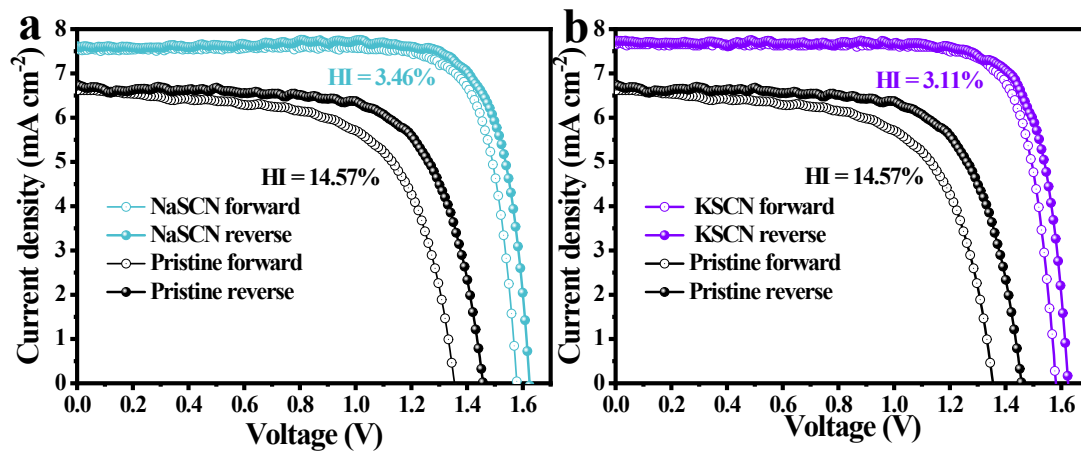

**Fig. S8**  $J$ - $V$  curves of the  $\text{CsPbBr}_3$  PSCs doped with (a) NaSCN and (b) KSCN under reverse and forward scanning. Hysteresis index (H-index) =  $(\text{PCE}_{\text{reverse}} - \text{PCE}_{\text{forward}})/\text{PCE}_{\text{reverse}} \times 100\%$ .

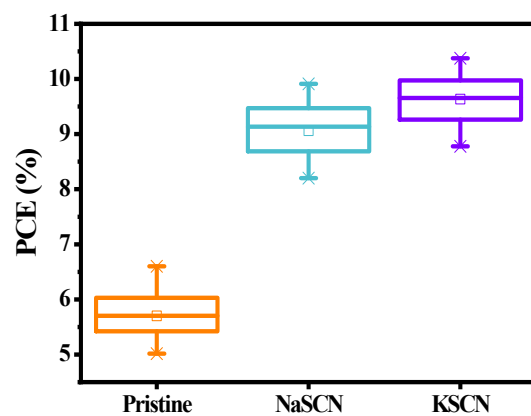

**Fig. S9** The statistical distribution of PCE for different HTM-free CsPbBr<sub>3</sub> PSCs.

**Table S1.** TRPL decay carrier lifetimes parameters of excitonic transitions for various CsPbBr<sub>3</sub> films deposited on glass.

| Devices    | $\tau_1$ (ns) | $\tau_2$ (ns) | $A_1$  | $A_2$  | $\tau_{ave}$ (ns) |
|------------|---------------|---------------|--------|--------|-------------------|
| Pristine   | 0.11          | 3.97          | 72.12% | 27.88% | 0.15              |
| with NaSCN | 0.15          | 5.45          | 75.82% | 24.18% | 0.22              |
| with KSCN  | 0.15          | 5.47          | 73.14% | 26.86% | 0.24              |

**Table S2.** Photovoltaic parameters of carbon-based HTM-free CsPbBr<sub>3</sub> PSCs with NaSCN dopant at different molar ratio.

| Devices  | $J_{SC}$ (mA cm <sup>-2</sup> ) | $V_{OC}$ (V) | FF (%) | PCE (%) |
|----------|---------------------------------|--------------|--------|---------|
| 1% NaSCN | 7.45                            | 1.509        | 75.11  | 8.44    |
| 3% NaSCN | 7.61                            | 1.621        | 80.35  | 9.91    |
| 5% NaSCN | 7.32                            | 1.477        | 76.21  | 8.23    |
| 7% NaSCN | 7.14                            | 1.468        | 74.49  | 7.88    |

**Table S3.** Photovoltaic parameters of carbon-based HTM-free CsPbBr<sub>3</sub> PSCs with KSCN dopant at different molar ratio.

| Devices | $J_{SC}$ (mA cm <sup>-2</sup> ) | $V_{OC}$ (V) | FF (%) | PCE (%) |
|---------|---------------------------------|--------------|--------|---------|
| 1% KSCN | 7.29                            | 1.488        | 75.48  | 8.18    |
| 3% KSCN | 7.42                            | 1.522        | 78.61  | 8.87    |
| 5% KSCN | 7.74                            | 1.624        | 82.57  | 10.38   |
| 7% KSCN | 7.31                            | 1.521        | 76.79  | 8.53    |

**Table S4.** Summary of the photovoltaic parameters of the state-of-the-art CsPbBr<sub>3</sub> PSCs.

| Cell configuration                                                                                             | $V_{oc}$<br>(V) | $J_{sc}$<br>(mA<br>cm <sup>-2</sup> ) | FF<br>(%)    | PCE<br>(%)   | Ref.                 |
|----------------------------------------------------------------------------------------------------------------|-----------------|---------------------------------------|--------------|--------------|----------------------|
| <b>FTO/c-TiO<sub>2</sub>/m-TiO<sub>2</sub>/CsPbBr<sub>3</sub>-<br/>Na(K)SCN/Carbon</b>                         | <b>1.624</b>    | <b>7.74</b>                           | <b>82.57</b> | <b>10.38</b> | <b>This<br/>work</b> |
| FTO/c-TiO <sub>2</sub> /m-TiO <sub>2</sub> / CsPbBr <sub>3</sub> -SnBr <sub>2</sub> /Carbon                    | 1.370           | 7.66                                  | 82.22        | 8.63         | S[1]                 |
| FTO/c-TiO <sub>2</sub> /m-TiO <sub>2</sub> /CsPbBr <sub>3</sub> /Carbon                                        | 1.220           | 7.40                                  | 84.10        | 7.37         | S[2]                 |
| FTO/c-TiO <sub>2</sub> /m-TiO <sub>2</sub> / CsPbBr <sub>3</sub> -Co/Carbon                                    | 1.380           | 7.48                                  | 84.00        | 8.37         | S[3]                 |
| FTO/c-TiO <sub>2</sub> /CsPbBr <sub>3</sub> /spiro-OMeTAD/Au                                                   | 1.500           | 5.60                                  | 62.00        | 5.40         | S[4]                 |
| FTO/c-TiO <sub>2</sub> /m-TiO <sub>2</sub> /GQDs/CsPbBr <sub>3</sub> /Carbon                                   | 1.458           | 8.12                                  | 82.10        | 9.72         | S[5]                 |
| FTO/c-TiO <sub>2</sub> /m-TiO <sub>2</sub> /CsPbBr <sub>2.98</sub> Cl <sub>0.02</sub> / Carbon                 | 1.571           | 7.47                                  | 82.93        | 9.73         | S[6]                 |
| ITO/SnO <sub>2</sub> /CsPbBr <sub>3</sub> /PMMA/Carbon                                                         | 1.580           | 7.93                                  | 76.51        | 9.60         | S[7]                 |
| FTO/c-TiO <sub>2</sub> /CsPbBr <sub>3</sub> /Carbon                                                            | 1.375           | 7.76                                  | 79.31        | 8.47         | S[8]                 |
| FTO/Sb-TiO <sub>2</sub> /CsPbBr <sub>3</sub> /Carbon                                                           | 1.654           | 6.70                                  | 80.40        | 8.91         | S[9]                 |
| FTO/c-TiO <sub>2</sub> /CsPbBr <sub>3</sub> /Carbon                                                            | 1.490           | 6.89                                  | 79.00        | 8.11         | S[10]                |
| FTO/c-TiO <sub>2</sub> /CsPbBr <sub>3</sub> /Carbon                                                            | 1.510           | 7.48                                  | 84.49        | 9.55         | S[11]                |
| FTO/c-TiO <sub>2</sub> /CsPbBr <sub>3</sub> /Carbon                                                            | 1.380           | 8.81                                  | 75.00        | 9.11         | S[12]                |
| FTO/c-TiO <sub>2</sub> /m-TiO <sub>2</sub> / CsPb <sub>9.875</sub> Sn <sub>0.125</sub> Br <sub>3</sub> /carbon | 1.360           | 8.57                                  | 69.00        | 8.04         | S[13]                |
| FTO/c-TiO <sub>2</sub> /m-TiO <sub>2</sub> /CsPbBr <sub>3</sub> /Carbon                                        | 1.359           | 8.56                                  | 72.00        | 8.38         | S[14]                |
| FTO/c-TiO <sub>2</sub> /T-CsPbBr <sub>3</sub> /Carbon                                                          | 1.595           | 7.52                                  | 81.41        | 9.82         | S[15]                |
| FTO/ TiO <sub>2</sub> /CsPbBr <sub>3</sub> /Carbon                                                             | 1.555           | 7.96                                  | 83.00        | 10.27        | S[16]                |
| FTO/c-TiO <sub>2</sub> /m-TiO <sub>2</sub> /ASF/CsPbBr <sub>3</sub> /Carbon                                    | 1.615           | 7.47                                  | 83.56        | 10.08        | S[17]                |
| FTO/c-TiO <sub>2</sub> /m-TiO <sub>2</sub> /CsPbBr <sub>3</sub> /DCC/Carbon                                    | 1.611           | 7.79                                  | 80.96        | 10.16        | S[18]                |

**Table S5.** The stable output current density and PCE of various carbon-based CsPbBr<sub>3</sub> PSCs without HTMs at the voltage of maximum power point in **Fig. 3f**.

| Devices    | $J_{MPP}$ (mA cm <sup>-2</sup> ) | PCE <sub>MPP</sub> (%) |
|------------|----------------------------------|------------------------|
| Pristine   | 5.80                             | 6.40                   |
| with NaSCN | 6.87                             | 9.55                   |
| with KSCN  | 7.41                             | 10.23                  |

**Table S6.** The  $V_{\text{TFL}}$  and  $n_{\text{trap}}$  values of various CsPbBr<sub>3</sub> films.

| Samples    | $V_{\text{TFL}}$ (V) | $n_{\text{trap}}$ ( $10^{14} \text{ cm}^{-3}$ ) |
|------------|----------------------|-------------------------------------------------|
| Pristine   | 0.383                | 4.596                                           |
| with NaSCN | 0.197                | 2.364                                           |
| with KSCN  | 0.172                | 2.064                                           |



**Table S7.** EIS parameters of various carbon-based HTM-free CsPbBr<sub>3</sub> PSCs.

| Devices    | $R_s$ ( $\Omega$ cm <sup>2</sup> ) | $R_{rec}$ ( $\Omega$ cm <sup>2</sup> ) |
|------------|------------------------------------|----------------------------------------|
| Pristine   | 15.25                              | 47.64                                  |
| with NaSCN | 12.88                              | 67.94                                  |
| with KSCN  | 10.29                              | 75.32                                  |

## Reference

- [1] H. Guo, Y. Pei, J. Zhang, C. Cai, K. Zhou, Y. Zhu, Doping with SnBr<sub>2</sub> in CsPbBr<sub>3</sub> to enhance the efficiency of all-inorganic perovskite solar cells, *J. Mater. Chem. C* 7 (2019) 11234-11243
- [2] D. Huang, P. Xie, Z. Pan, H. Rao, X. Zhong, One-step solution deposition of CsPbBr<sub>3</sub> based on precursor engineering for efficient all-inorganic perovskite solar cells, *J. Mater. Chem. A* 7 (2019) 22420-22428.
- [3] C. Wang, Y. Long, X. Liu, S. Fu, J. Wang, J. Zhang, Z. Hu, Y. Zhu, A dual promotion strategy of interface modification and ion doping for efficient and stable carbon-based planar CsPbBr<sub>3</sub> perovskite solar cells, *J. Mater. Chem. C*, 8 (2020) 17211-17221.
- [4] Q. A. Akkerman, M. Gandini, F. Di Stasio, P. Rastogi, F. Palazon, G. Bertoni, J. M. Ball, M. Prato, A. Petrozza, L. Manna, Strongly emissive perovskite nanocrystal inks for high-voltage solar cells, *Nat. Energy* 2 (2016) 16194-16200.
- [5] J. Duan, Y. Zhao, B. He, Q. Tang, High-purity inorganic perovskite films for solar cells with 9.72 % efficiency, *Angew. Chem., Int. Ed.* 57 (2018) 3787-3791.
- [6] X. Li, B. He, Z. Gong, J. Zhu, W. Zhang, H. Chen, Y. Duan, Q. Tang, Compositional engineering of chloride ion-doped CsPbBr<sub>3</sub> halides for highly efficient and stable all-inorganic perovskite solar cells, *Sol. RRL* 4 (2020) 2000362.

- [7] A. Tong, C. Zhu, H. Yan, C. Zhang, Y. Jin, Y. Wu, F. Cao, J. Wu, W. Sun, Defect control for high-efficiency all-inorganic CsPbBr<sub>3</sub> perovskite solar cells via hydrophobic polymer interface passivation, *J. Alloy. Compd.* 942 (2023) 169084
- [8] D. Wang, W. Li, Z. Du, G. Li, W. Sun, J. Wu, Z. Lan, Highly efficient CsPbBr<sub>3</sub> planar perovskite solar cells via additive engineering with NH<sub>4</sub>SCN, *ACS Appl. Mater. Interfaces* 12 (2020) 10579-10587.
- [9] Y. Xu, J. Duan, X. Yang, J. Du, Y. Wang, Y. Duan, Q. Tang, Lattice-tailored low-temperature processed electron transporting materials boost the open-circuit voltage of planar CsPbBr<sub>3</sub> perovskite solar cells up to 1.654 V, *J. Mater. Chem. A* 8 (2020) 11859-11866.
- [10] X. Wan, Z. Yu, W. Tian, F. Huang, S. Jin, X. Yang, Y. Cheng, A. Hagfeldt, L. Sun, Efficient and stable planar all-inorganic perovskite solar cells based on high-quality CsPbBr<sub>3</sub> films with controllable morphology, *J. Energy Chem.* 46 (2019) 8-15.
- [11] S. Wang, F. Cao, W. Sun, C. Wang, Z. Yan, N. Wang, Z. Lan, J. Wu, A green Bi-solvent system for processing high-quality CsPbBr<sub>3</sub> films in efficient all-inorganic perovskite solar cells, *Mater. Today Phys.* 22 (2022) 100614.
- [12] J. Bi, J. Chang, M. Lei, W. Zhang, F. Meng, G. Wang, T. Facile, Fabrication of high-quality CsPbBr<sub>3</sub> perovskite films for high-performance solar cells, *ACS Appl. Mater. Interfaces* 14 (2022) 48888-48896
- [13] G. Wang, J. Bi, J. Chang, M. Lei, H. Zheng, Y. Yan, Bandgap tuning of a CsPbBr<sub>3</sub> perovskite with synergistically improved quality via Sn<sup>2+</sup> doping for

- high-performance carbon-based inorganic perovskite solar cells, *Inorg. Chem. Front.*, 9 (2022) 4359-4368
- [14] X. Zhao, C. Xu, X. Wang, J. Guo, M. Wu, Construction of multilevel network structured carbon nanofiber counter electrode and back interface engineering in all inorganic HTL-free perovskite solar cells, *Colloid. Surface. A.*, 648 (2022) 129420
- [15] Z. Gong, B. He, J. Zhu, X. Yao, S. Wang, H. Chen, Y. Duan, Q. Tang, Tri-Brominated perovskite film management and multiple-ionic defect passivation for highly efficient and stable solar cells, *Sol. RRL* 5 (2021) 202000819.
- [16] Z. Zhang, W. Zhu, T. Han, T. Wang, W. Chai, J. Zhu, H. Xi, D. Chen, G. Lu, P. Dong, J. Zhang, C. Zhang, Y. Hao, Accelerated sequential deposition reaction via crystal orientation engineering for low-temperature, high-efficiency carbon-electrode CsPbBr<sub>3</sub> solar cells, *Energy Environ. Mater.* (0) 2023 e12524.
- [17] L. Cui, B. He, Y. Ding, J. Zhu, X. Yao, J. Ti, H. Chen, Y. Duan, Q. Tang, Multifunctional interface modifier ammonium silicofluoride for efficient and stable all-inorganic CsPbBr<sub>3</sub> perovskite solar cells, *Chem. Eng. J.*, 431 (2022) 134193.
- [18] J. Zhu, Y. Liu, B. He, W. Zhang, L. Cui, S. Wang, H. Chen, Y. Duan, Q. Tang, Efficient interface engineering of N, N'-Dicyclohexylcarbodiimide for stable HTMs-free CsPbBr<sub>3</sub> perovskite solar cells with 10.16%-efficiency, *Chem. Eng. J.* 428 (2022) 131950.
